# Supplementary material for: Prognosis of undiagnosed chest pain: linked electronic health record cohort study
Source: PubMed Central journal article supplement (PMC5482346; doi:10.1136/bmj.j1194), 2017-04-03

Appendix table 1 - Association of cardiovascular risk factors with type of chest pain on index date, adjusted RRR (95% CI) derived from multinomial logistic regression

|                                            |       | Age < 65                   |                   | Age ≥ 65                   |                   |
|--------------------------------------------|-------|----------------------------|-------------------|----------------------------|-------------------|
| Chest pain non-coronary is reference group |       | Chest pain<br>Unattributed | Angina            | Chest pain<br>Unattributed | Angina            |
| Female                                     |       | 1.00                       | 1.00              | 1.00                       | 1.00              |
| Male                                       |       | 1.24 (1.20, 1.28)          | 1.80 (1.64, 1.96) | 1.32 (1.24, 1.41)          | 1.45 (1.34, 1.57) |
| Age                                        | 18-44 | 1.00                       | 1.00              | -                          | -                 |
|                                            | 45-64 | 1.28 (1.24, 1.33)          | 5.68 (5.10, 6.32) | -                          | -                 |
|                                            | 65-74 | -                          | -                 | 1.00                       | 1.00              |
|                                            | 75+   | -                          | -                 | 0.95 (0.90, 1.01)          | 1.68 (1.55, 1.82) |
| Deprivation quintile                       | Least | 1.00                       | 1.00              | 1.00                       | 1.00              |
|                                            | 2     | 1.02 (0.93, 1.11)          | 1.12 (0.97, 1.29) | 1.08 (0.95, 1.23)          | 1.05 (0.90, 1.24) |
|                                            | 3     | 1.03 (0.93, 1.14)          | 1.28 (1.09, 1.51) | 1.15 (0.99, 1.34)          | 1.22 (1.04, 1.43) |
|                                            | 4     | 1.08 (0.97, 1.22)          | 1.42 (1.19, 1.68) | 1.11 (0.94, 1.30)          | 1.21 (1.01, 1.46) |
|                                            | Most  | 1.03 (0.90, 1.18)          | 1.42 (1.17, 1.71) | 1.16 (0.97, 1.37)          | 1.28 (1.04, 1.57) |
| Diabetes <sup>a</sup>                      | No    | 1.00                       | 1.00              | 1.00                       | 1.00              |
|                                            | Yes   | 0.95 (0.86, 1.05)          | 1.23 (1.04, 1.45) | 0.99 (0.88, 1.10)          | 1.08 (0.94, 1.24) |
| Hypertension <sup>a</sup>                  | No    | 1.00                       | 1.00              | 1.00                       | 1.00              |

|                                               |              |                   |                   |                   |                   |
|-----------------------------------------------|--------------|-------------------|-------------------|-------------------|-------------------|
|                                               | Yes          | 1.42 (1.31, 1.53) | 3.49 (3.08, 3.95) | 1.36 (1.26, 1.46) | 2.37 (2.17, 2.59) |
| Lipid-lowering drug prescription <sup>a</sup> | No           | 1.00              | 1.00              | 1.00              | 1.00              |
|                                               | Yes          | 1.20 (1.11, 1.29) | 2.92 (2.55, 3.34) | 1.06 (0.98, 1.15) | 1.91 (1.71, 2.13) |
| BMI <sup>b</sup>                              | Normal       | 1.00              | 1.00              | 1.00              | 1.00              |
|                                               | Underweight  | 0.88 (0.82, 0.96) | 0.64 (0.42, 0.98) | 1.14 (0.94, 1.39) | 0.94 (0.69, 1.29) |
|                                               | Overweight   | 1.12 (1.08, 1.15) | 1.54 (1.38, 1.71) | 1.07 (1.00, 1.14) | 1.24 (1.13, 1.36) |
|                                               | Obese        | 1.19 (1.14, 1.24) | 1.86 (1.66, 2.07) | 1.19 (1.10, 1.30) | 1.46 (1.29, 1.66) |
|                                               | Not recorded | 1.01 (0.95, 1.07) | 1.14 (0.98, 1.32) | 1.11 (0.98, 1.26) | 1.49 (1.26, 1.76) |
| Smoking <sup>b</sup>                          | Non          | 1.00              | 1.00              | 1.00              | 1.00              |
|                                               | Ex           | 1.05 (1.00, 1.09) | 1.20 (1.08, 1.33) | 1.02 (0.95, 1.10) | 1.11 (1.00, 1.24) |
|                                               | Current      | 0.97 (0.93, 1.00) | 1.18 (1.06, 1.31) | 0.96 (0.87, 1.06) | 0.96 (0.84, 1.11) |
|                                               | Not recorded | 0.90 (0.84, 0.97) | 1.00 (0.87, 1.15) | 1.04 (0.90, 1.20) | 1.21 (1.02, 1.42) |

<sup>a</sup> in the two years prior to index date; <sup>b</sup> nearest measurement prior to index date. Multinomial

logistic regression, estimates adjusted for presented variables and index year

Appendix Table 2 – Cardiovascular events during full follow-up (0 to 5.5 years) stratified by type of chest pain at index date

| Type of chest pain at index date | Any cardiovascular event |                     |                                       | Myocardial infarction |                     |                                       |
|----------------------------------|--------------------------|---------------------|---------------------------------------|-----------------------|---------------------|---------------------------------------|
|                                  | <i>n</i> at risk         | <i>n</i> with event | Rate per 10,000 person years (95% CI) | <i>n</i> at risk      | <i>n</i> with event | Rate per 10,000 person years (95% CI) |
| Non-coronary                     | 39,232                   | 1,341               | 107 (101, 113)                        | 39,232                | 216                 | 17 (15, 19)                           |
| Unattributed                     | 124,668                  | 11,127              | 292 (287, 298)                        | 124,668               | 1,850               | 46 (44, 48)                           |
| Angina                           | N/A                      | N/A                 | N/A                                   | 8,260                 | 660                 | 244 (226, 264)                        |
| Total                            | 163,920                  | 12,468              | 246 (242, 251)                        | 172,180               | 2,726               | 49 (47, 51)                           |

N/A Not applicable

Appendix Figure 1 – Age-gender incidence of chest pain and angina by year

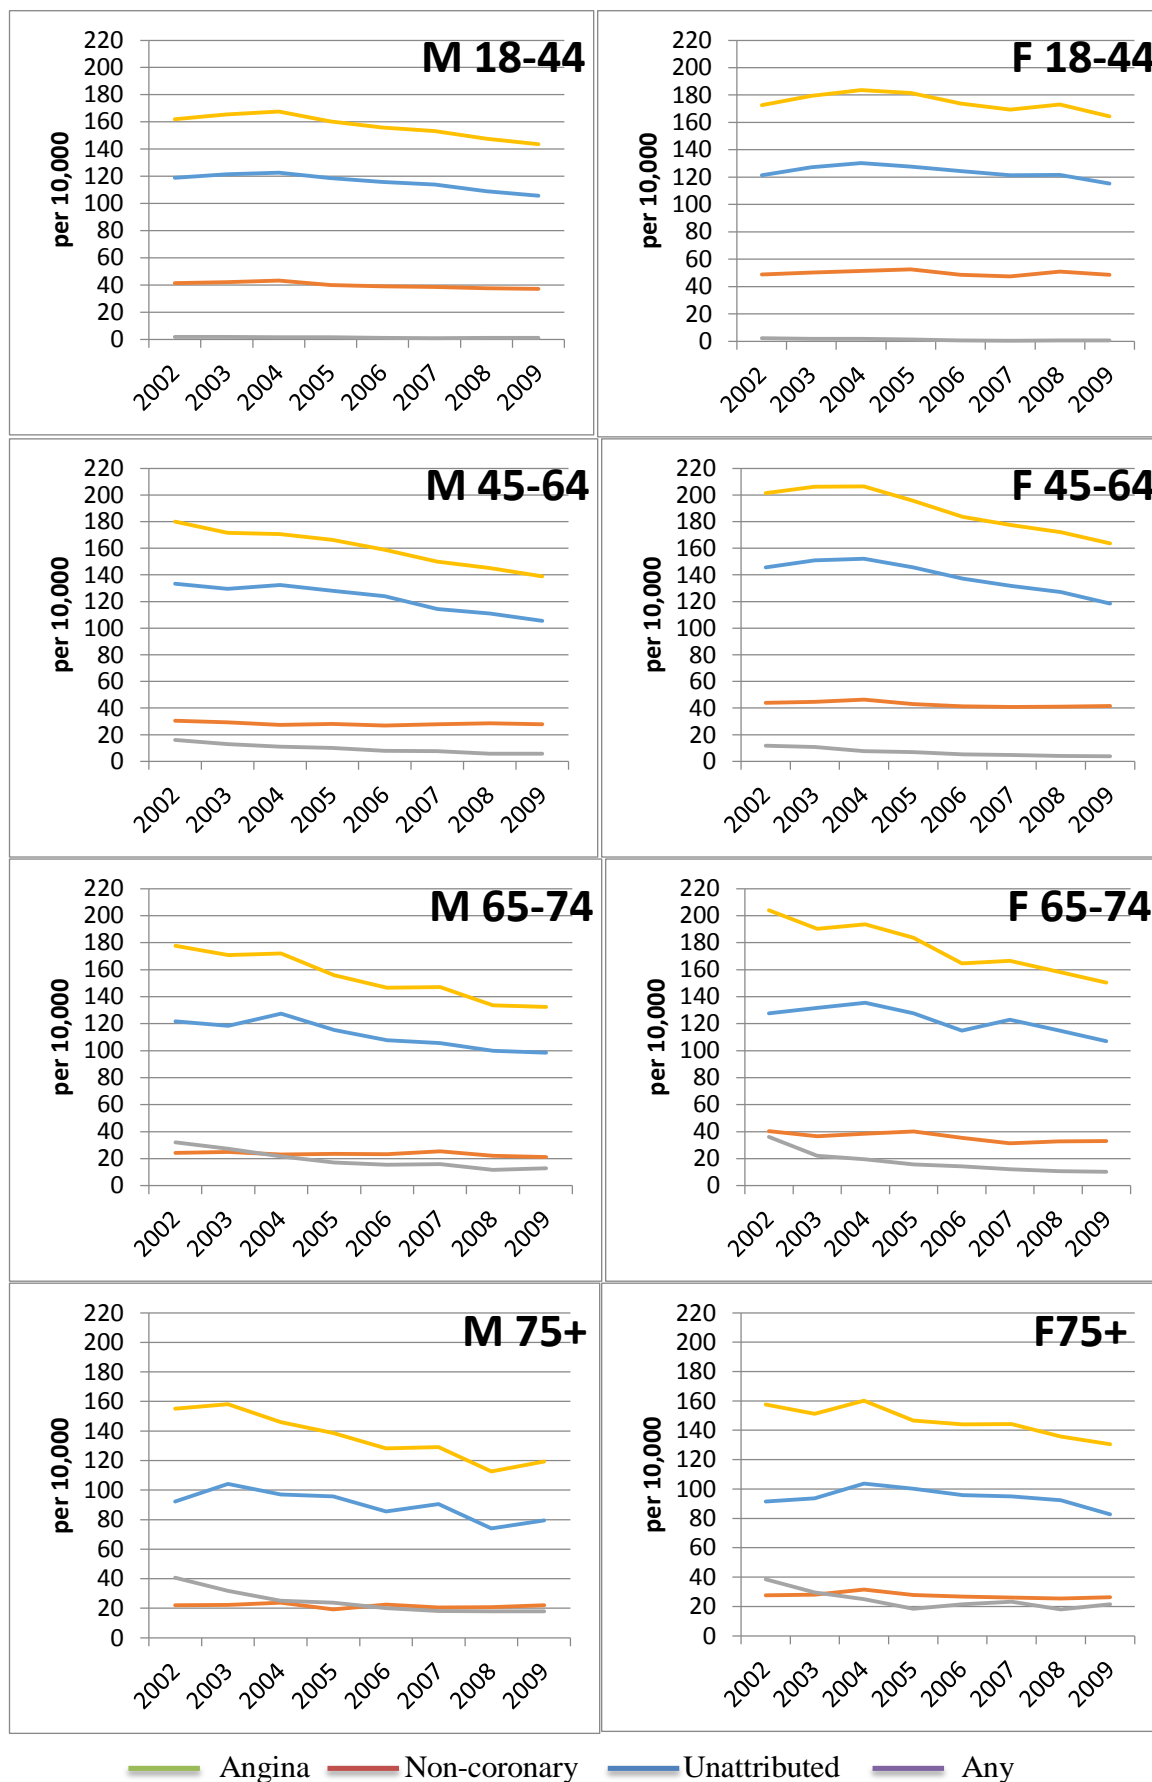

Supplement: jork037019.ww1.pdf [file jork037019.ww1.pdf]
